# Supplementary material
Source: PubMed Central journal article supplement (PMC8088607)
Supplement: JB.00685-20-s0001.pdf [file JB.00685-20-s0001.pdf]

1 **Supplemental Figures:**

**A.** Mycobacterial Mce-domain containing proteins

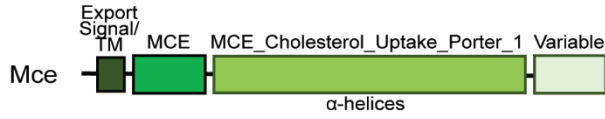

**B.** *E. coli* Mce-domain containing proteins

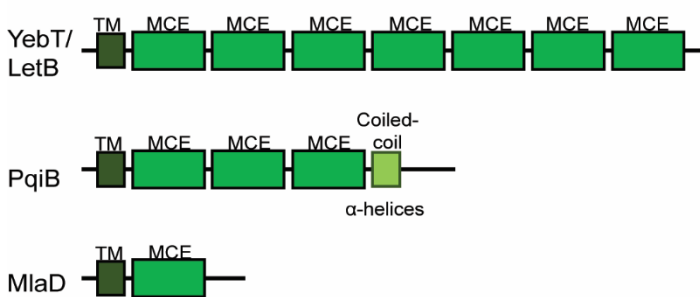

2

3 **Figure S1:**

4 Domains of Mce-domain containing proteins of **A.** mycobacterial Mce proteins and **B.** *E. coli*  
5 Mla, YebT/LetB and PqiB proteins. The Mce domain was identified by PFam02470 and the  
6 Mce\_CUP1 domain was identified PFam11887 (1).

7

8

9

10

11

12

13

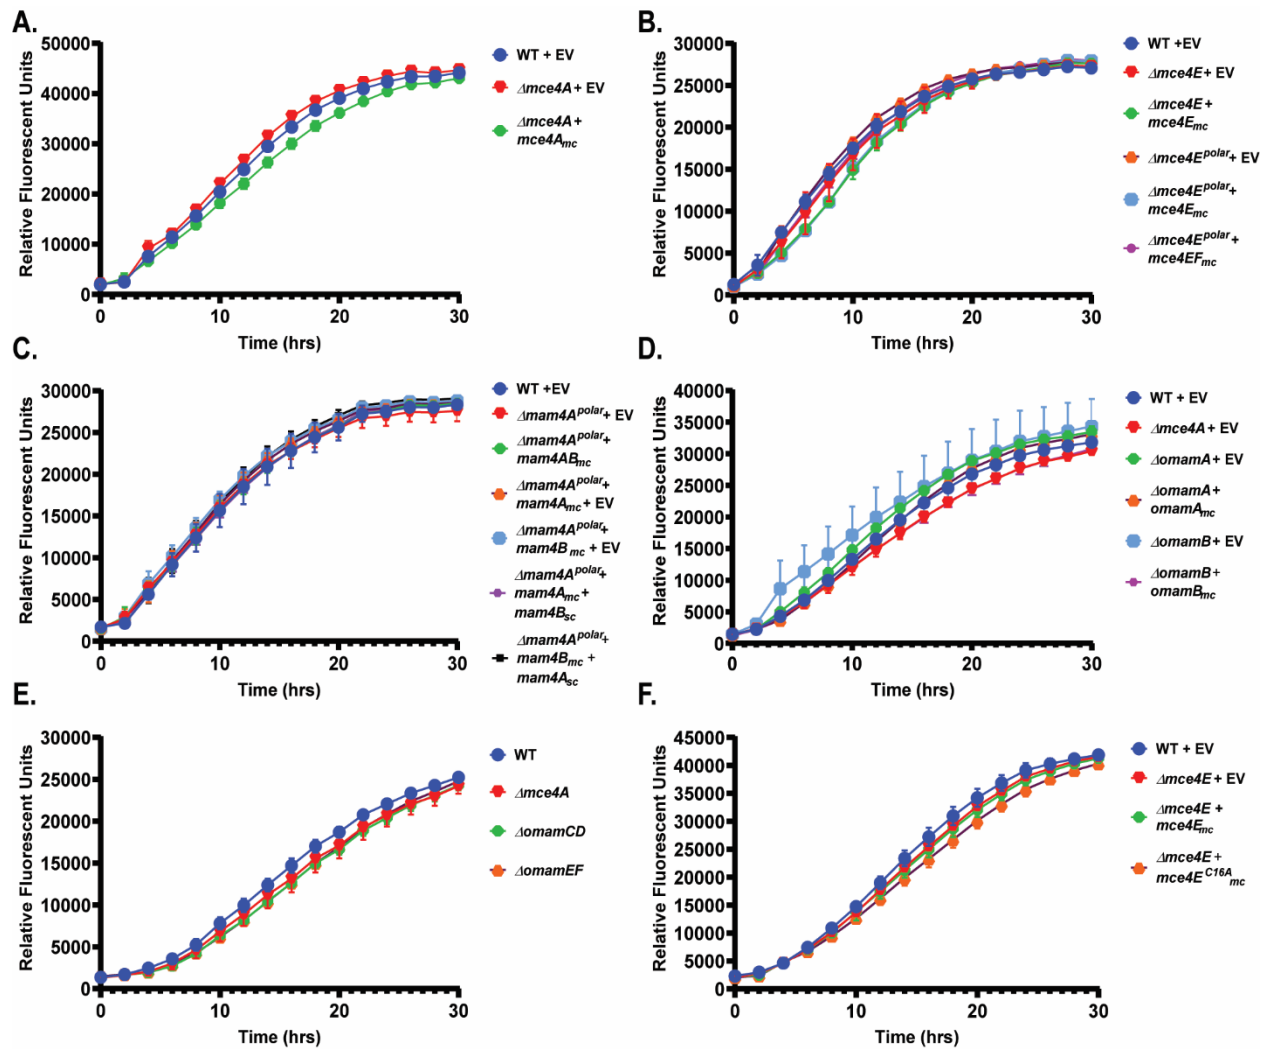

14

15 **Figure S2:**

16 Individual *mce4*, *mam4*, and *omamA* and *omamB* *M. smegmatis* mutants and complemented  
 17 strains do not have a growth defect compared to WT when growing on Glucose and Glycerol

18 carbon sources. **A-E.** Growth of  $10^4$  colony forming units (cfu) of *M. smegmatis* strains on  
 19 glucose and glycerol as the sole carbon sources was measured over time using resazurin

20 reduction as a fluorescent readout of metabolic activity (2, 3). Glucose and Glycerol growth

21 curves measured by resazurin reduction of **A.**  $\Delta mce4A$  and complemented strains **B.**  $\Delta mce4E$ ,

22  $\Delta mce4E^{polar}$  and complemented strains **C.**  $\Delta mam4A^{polar}$  and complemented strains **D.**  $\Delta omamA$ ,

23 *ΔomamB*, and complemented strains **E.** *ΔomamCD* and *ΔomamEF* mutants and **F.** *Δmce4E* with  
24 *Mce4E*<sup>C16A</sup> complementation strains of *M. smegmatis* strains are depicted. Mutant strains contain  
25 empty vectors (EV) as indicated.

26

27

28

29

30

31

32

33

34

35

36

37

38

39

40

41

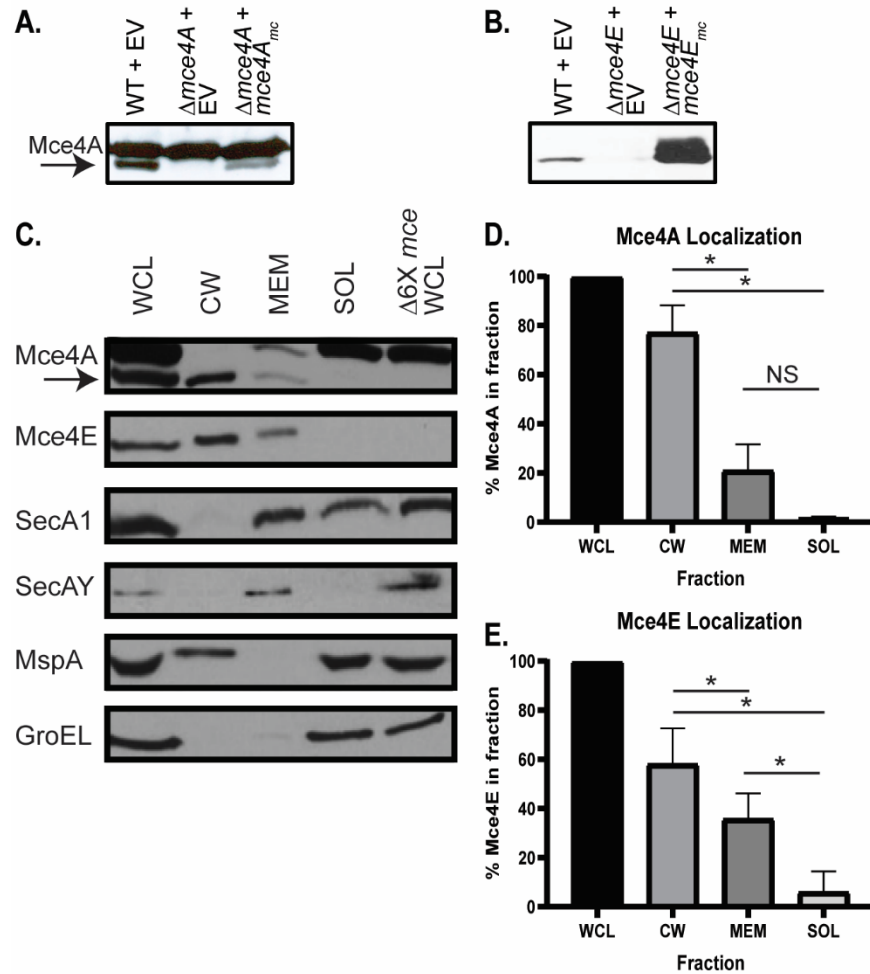

42

43 **Figure S3:**

44 Localization of Mce4A and Mce4E proteins. **A.** Immunoblots of Mce4A and **B.** Mce4E proteins  
 45 show that Mce4A and Mce4E antibodies are specific and do not cross react with other Mce  
 46 proteins. Arrow indicates Mce4A band to distinguish it from the higher species cross-reacting  
 47 band. Mutant strains contain empty vectors (EV) as indicated. **C.** Localization of Mce4A and  
 48 Mce4E protein in WT *M. smegmatis*. Subcellular fractions were isolated using  
 49 ultracentrifugation, during which clarified whole cell lysate (WCL) was separated into cell wall  
 50 (CW), membrane (MEM), and soluble (SOL) fractions. Fractions were separated by SDS-PAGE  
 51 and were immunoblotted for Mce4A and Mce4E proteins. The total amount of CW, MEM, and

52 SOL fractions shown is equivalent to the amount of WCL loaded. WCL from a *M. smegmatis*  
53 strain lacking all six Mce systems ( $\Delta 6X$  *mce*) acts as a control for Mce4A and Mce4E antibody  
54 specificity (5). Loading controls for the various fractions include the SecA1 ATPase (MEM and  
55 SOL) (6), the SecY translocation permease (MEM) (7), the MspA porin protein (CW and SOL)  
56 (8), and the GroEL chaperone protein (SOL) (8). Quantification of **D.** Mce4A and **E.** Mce4E  
57 proteins in subcellular fraction western blots using ImageJ software (9). \* indicates  $p < 0.001$  and  
58 error bars indicate the standard error of the mean of at least three independent experiments.

59

60

61

62

63

64

65

66

67

68

69

70

71

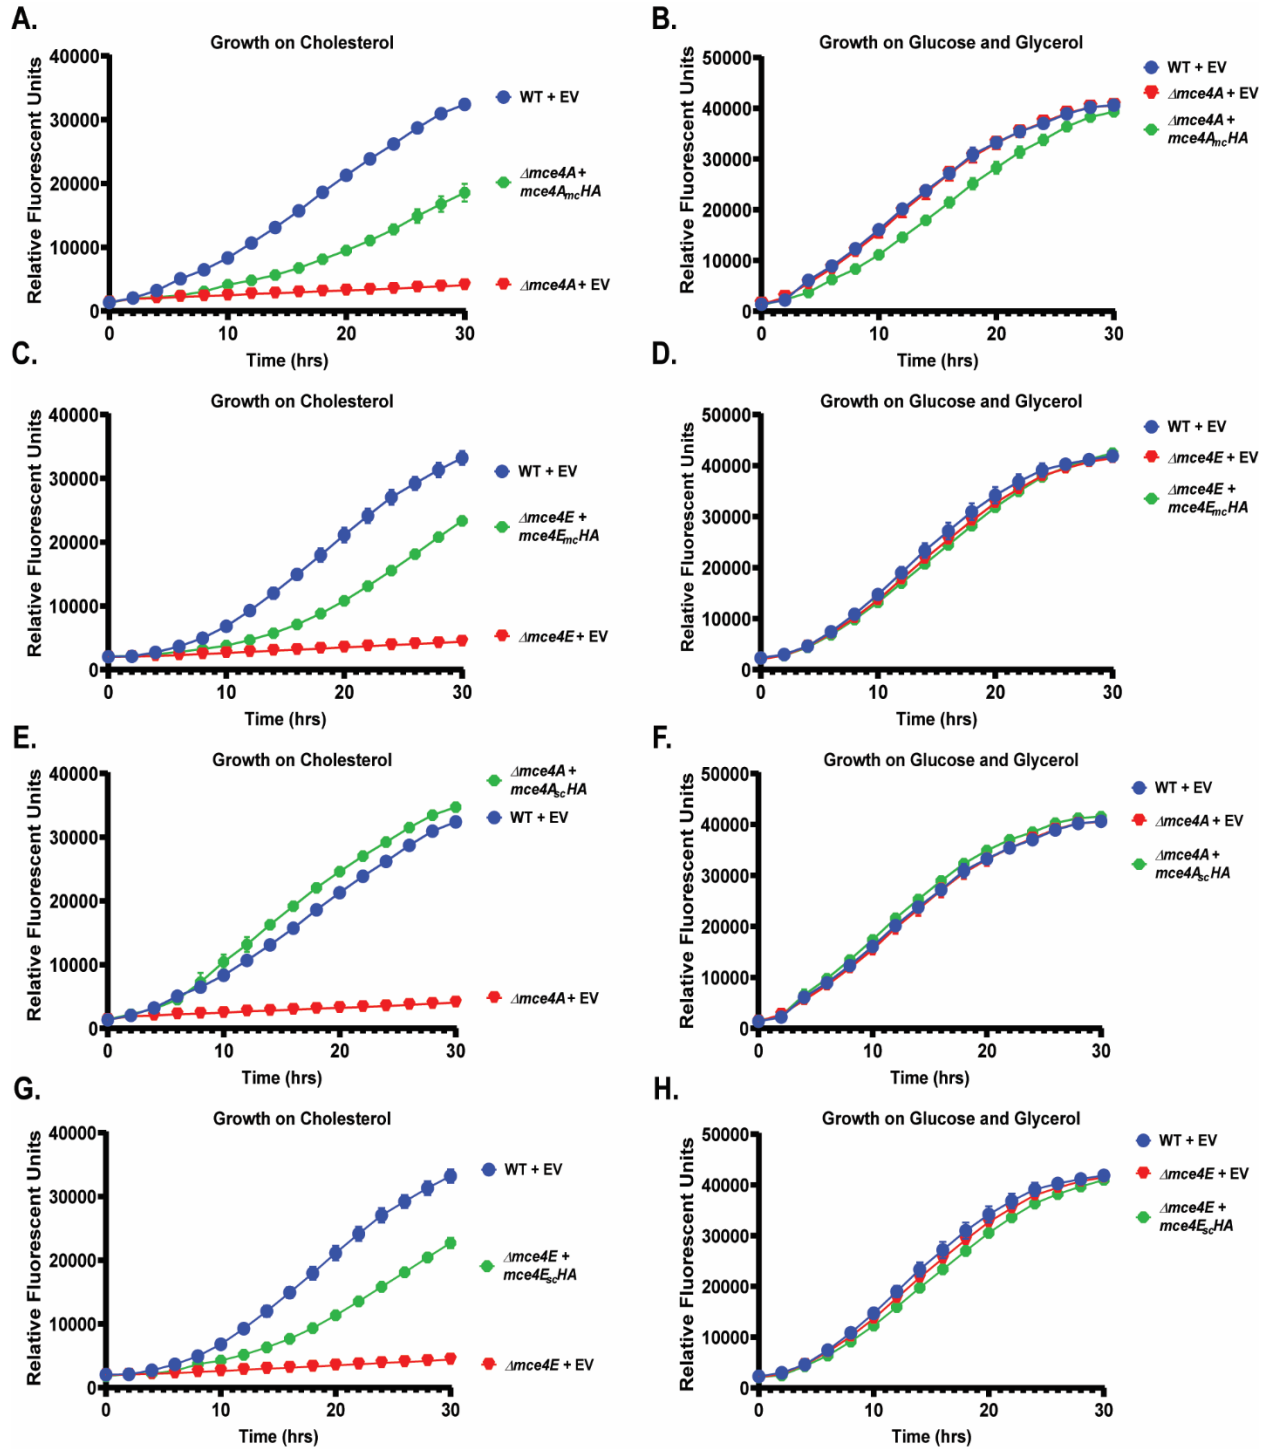

72

73 **Figure S4:**

74 Mce4A-HA and Mce4E-HA expression plasmids complement the mutant phenotypes of  $\Delta mce4A$   
 75 and  $\Delta mce4E$  strains. **A-E.** Growth of  $10^4$  colony forming units (cfu) of *M. smegmatis* strains with

76 cholesterol or glucose and glycerol as the sole carbon source(s) was measured over time using  
77 resazurin reduction as a fluorescent readout of metabolic activity (2). Cholesterol growth curves  
78 measured by resazurin reduction of **A.** *Δmce4A* and *mce4A-HA* multicopy expression strains **C.**  
79 *Δmce4E* and *mce4E-HA* multicopy expression strains **E.** *Δmce4A* and *mce4A-HA* single copy  
80 expression strains **G.** *Δmce4E* and *mce4E-HA* single copy expression strains of *M. smegmatis*  
81 strains are depicted. Glucose and Glycerol growth curves (cfu) of **B.** *Δmce4A* and *mce4A-HA*  
82 multicopy expression strains **D.** *Δmce4E* and *mce4E-HA* multicopy expression strains **F.** *Δmce4A*  
83 and *mce4A-HA* single copy expression strains **H.** *Δmce4E* and *mce4E-HA* single copy expression  
84 strains of *M. smegmatis* strains are depicted. Mutant strains contain empty vectors (EV) as  
85 indicated.

86

87

88

89

90

91

92

93

94

95

96 **Supplemental Tables**

97 **Table S1:** Percent identity between *M. smegmatis* Mce4 proteins determined with the NCBI

98 BLAST Two-sequence Alignment function, using the BLOSUM62 matrix (10)

|       | Mce4A | Mce4B | Mce4C | Mce4D | Mce4E | Mce4F |
|-------|-------|-------|-------|-------|-------|-------|
| Mce4A | 100   | 22.87 | 26.04 | 22.14 | 24.71 | 21.26 |
| Mce4B | 22.87 | 100   | 21.68 | 23.02 | 18.97 | 24.18 |
| Mce4C | 26.04 | 21.68 | 100   | 23.19 | 25.00 | 21.76 |
| Mce4D | 22.14 | 23.02 | 23.19 | 100   | 21.13 | 22.73 |
| Mce4E | 24.71 | 18.97 | 25.00 | 21.13 | 100   | 24.39 |
| Mce4F | 21.26 | 24.18 | 21.76 | 22.73 | 24.39 | 100   |

99

100

101

102

103

104

105

106

107

108



109 **Table S2:** *Mycobacterium smegmatis* strains

| <i>Mycobacterium smegmatis</i><br>Strain | Genotype and/or<br>description                                                                     | Source or reference        |
|------------------------------------------|----------------------------------------------------------------------------------------------------|----------------------------|
| mc <sup>2</sup> 155                      | Wildtype (WT)                                                                                      | Snapper et al., 1990 (11)  |
| $\Delta mce4A$                           | $\Delta$ MSMEG_5900                                                                                | This study                 |
| $\Delta mce4E$                           | $\Delta$ MSMEG_5896                                                                                | This study                 |
| $\Delta mce4E^{polar}$                   | $\Delta$ MSMEG_5896 with polar effects that disrupt MSMEG_5895                                     | This study                 |
| $\Delta mam4A^{polar}$                   | $\Delta$ MSMEG_5894 with polar effects that disrupt MSMEG_5893                                     | This study                 |
| $\Delta omamA$                           | $\Delta$ MSMEG_0235                                                                                | Perkowski et al., 2016 (3) |
| $\Delta omamB$                           | $\Delta$ MSMEG_0236                                                                                | This study                 |
| $\Delta omamCD$                          | $\Delta$ MSMEG_4771-4770                                                                           | This study                 |
| $\Delta omamEF$                          | $\Delta$ MSMEG_2864-2865                                                                           | This study                 |
| $\Delta 6X mce$                          | $\Delta mce1$ , $\Delta mce3$ , $\Delta mce4$ , $\Delta mce5$ , $\Delta mce5b$ , and $\Delta mce7$ | Klepp et al., 2012 (5)     |

110

111

112

113

114

115

116

117

118

119

120

121 **Table S3:** Plasmids

| Plasmids                                                            | Genotype and/or description                                                                                            | Source or reference               |
|---------------------------------------------------------------------|------------------------------------------------------------------------------------------------------------------------|-----------------------------------|
| pMV261                                                              | Mycobacterial multicopy plasmid with <i>hsp60</i> promoter; Kan <sup>R</sup>                                           | Stover et al., 1991 (12)          |
| pLL2                                                                | Mycobacterial single copy plasmid that integrates at the tweety <i>attB</i> site; Hyg <sup>R</sup>                     | Ligon et al., 2013 (7)            |
| pJSC77                                                              | pMV261 with a cloning site for generating HA tagged fusions; Kan <sup>R</sup>                                          | Glickman et al., 2000 (13)        |
| pUC19                                                               | <i>E. coli</i> cloning vector; Carb <sup>R</sup>                                                                       | New England Biolabs               |
| pCR2.1 - TOPO                                                       | Cloning vector for topo cloning; Amp <sup>R</sup> and Kan <sup>R</sup>                                                 | Invitrogen                        |
| pMP62 (also referred to as pYUB657)                                 | Allelic exchange suicide vector containing <i>sacB</i> counterselection marker; Hyg <sup>R</sup>                       | Pavelka et al., 1999 (14)         |
| pMP1064                                                             | pBluescript KS res1-hyg-res1 cassette flanked by SmaI sites                                                            | Martinelli and Pavelka, 2016 (15) |
| pJV53                                                               | Mycobacterial multicopy plasmid encoding recombineering proteins gp60 and gp61; Kan <sup>R</sup>                       | Van Kessel and Hatful, 2007 (16)  |
| pMP854                                                              | Mycobacterial multicopy plasmid encoding <i>resolvase</i> ; Kan <sup>R</sup>                                           | Sanders AN et al., 2014 (17)      |
| pLR62; <i>Δmce4A</i> allelic exchange suicide vector                | pMP62 containing upstream and downstream fragments of <i>mce4A</i> (MSMEG_5900); Hyg <sup>R</sup>                      | This study                        |
| pBM44; P <sub><i>hsp60-mce4A<sub>ms</sub></i></sub> -HA multicopy   | pJSC77 containing <i>mce4A</i>                                                                                         | Miller et al., 2019 (18)          |
| pLR101; P <sub><i>hsp60-mce4A<sub>ms</sub></i></sub> multicopy      | pBM44 with HindIII site filled in by Klenow and self-ligated at the HpaI site to remove the HA tag from <i>mce4A</i> . | This study                        |
| pLR111; P <sub><i>hsp60-mce4A<sub>ms</sub></i></sub> -HA singlecopy | <i>mce4A-HA</i> from pBM44 cloned into pLL2 cut with NotI and EcoRV                                                    | This study                        |
| pLR112; <i>Δmce4E</i> precursor recombineering plasmid              | Upstream and downstream fragments of <i>mce4E</i>                                                                      | This study                        |

|                                                                               |                                                                                                                                           |            |
|-------------------------------------------------------------------------------|-------------------------------------------------------------------------------------------------------------------------------------------|------------|
|                                                                               | (MSMEG_5896) with an EcoRV site at the junction cloned into pUC19 cut with EcoRI and HindIII                                              |            |
| pLR113; $\Delta mce4E$ recombineering plasmid                                 | Hygromycin resistance cassette from pMP1064 was cloned into pLR112 cut with EcoRV                                                         | This study |
| pLR142; $mce4E$ TOPO intermediate                                             | $mce4E$ in PCR-2.1 TOPO vector                                                                                                            | This study |
| pLR106; P <sub><i>hsp60-mce4E<sub>ms</sub></i></sub> multicopy                | $mce4E$ from pLR142 (MSMEG_5896) cloned into pMV261 cut with EcoRI and HindIII restriction sites                                          | This study |
| pLR93; P <sub><i>hsp60-mce4E<sub>ms</sub></i></sub> -HA multicopy             | pJSC77 containing $mce4E$ (MSMEG_5896) cloned into MscI and HindIII restriction sites                                                     | This study |
| pLR116; P <sub><i>hsp60-mce4E<sub>ms</sub></i></sub> -HA singlecopy           | $mce4E$ -HA from pLR93 cloned into pLL2 cut with NotI and EcoRV                                                                           | This study |
| pLR114; P <sub><i>hsp60-mce4E<sup>C16A</sup><sub>ms</sub></i></sub> multicopy | Site Directed Mutagenesis of pLR106 to construct $mce4E$ C16A                                                                             | This study |
| pMB250; $\Delta mce4EF$ precursor recombineering plasmid                      | Upstream and Downstream fragments of $mce4E$ (MSMEG_5896) with an EcoRV site at the junction cloned into pUC19 cut with EcoRI and HindIII | This study |
| pLR97; $\Delta mce4EF$ recombineering plasmid                                 | Hygromycin resistance cassette from pMP1064 cloned into pMB250 cut with EcoRV                                                             | This study |
| pLR110; P <sub><i>hsp60-mce4EF<sub>ms</sub></i></sub> multicopy               | pMV261 containing $mce4EF$ (MSMEG_5896 and MSMEG_5895) cloned into MscI and HindIII restriction sites                                     | This study |
| pLR96; $\Delta mam4AB$ precursor recombineering plasmid                       | Upstream and Downstream fragments of $mam4A$ (MSMEG_5894) with an EcoRV site at the junction cloned into pUC19 cut with EcoRI and HindIII | This study |

|                                                                 |                                                                                                                                                |                            |
|-----------------------------------------------------------------|------------------------------------------------------------------------------------------------------------------------------------------------|----------------------------|
| pLR98; $\Delta$ <i>mam4AB</i> recombineering plasmid            | Hygromycin resistance cassette from pMP1064 cloned into pLR96 cut with EcoRV                                                                   | This study                 |
| pLR143; <i>mam4A</i> TOPO intermediate                          | <i>mam4A</i> in PCR2.1 TOPO vector                                                                                                             | This study                 |
| pLR107; P <sub><i>hsp60-mam4A<sub>ms</sub></i></sub> multicopy  | pMV261 containing <i>mam4A</i> (MSMEG_5894) from pLR143 cloned into pmv261 cut with EcoRI and HindIII restriction sites                        | This study                 |
| pLR130; P <sub><i>hsp60-mam4A<sub>ms</sub></i></sub> singlecopy | <i>mam4A</i> from pLR107 cloned into pLL2 cut with NotI and EcoRV                                                                              | This study                 |
| pLR126; P <sub><i>hsp60-mam4B<sub>ms</sub></i></sub> multicopy  | pMV261 containing <i>mam4B</i> (MSMEG_5893) cloned into MscI and HindIII restriction sites                                                     | This study                 |
| pLR132; P <sub><i>hsp60-mam4B<sub>ms</sub></i></sub> singlecopy | <i>mam4B</i> from pLR126 cloned into pLL2 cut with NotI and EcoRV                                                                              | This study                 |
| pLR124; P <sub><i>hsp60-mam4AB<sub>ms</sub></i></sub> multicopy | pMV261 containing <i>mam4AB</i> (MSMEG_5894 and MSMEG_5893) cloned into MscI and HindIII restriction sites                                     | This study                 |
| pEP139; P <sub><i>hsp60-omamA<sub>ms</sub></i></sub> multicopy  | pMV261 containing <i>omamA</i> (MSMEG_0235)                                                                                                    | Perkowski et al., 2016 (3) |
| pLR128; $\Delta$ <i>omamB</i> precursor recombineering plasmid  | Upstream and Downstream fragments of <i>omamB</i> (MSMEG_0236) with an EcoRV site at the junction cloned into pUC19 cut with EcoRI and HindIII | This study                 |
| pLR129; $\Delta$ <i>omamB</i> recombineering plasmid            | Hygromycin resistance cassette from pMP1064 cloned into pLR128 digested with EcoRV                                                             | This study                 |
| pLR141; P <sub><i>hsp60-omamB<sub>ms</sub></i></sub> multicopy  | pMV261 containing <i>omamB</i> (MSMEG_0236) cloned into MscI and HindIII restriction sites                                                     | This study                 |
| pLR134; $\Delta$ <i>omamCD</i> precursor recombineering plasmid | Upstream and Downstream fragments of <i>omamCD</i> (MSMEG_4771-4770) with an EcoRV site at the junction                                        | This study                 |

|                                                          |                                                                                                                                                     |            |
|----------------------------------------------------------|-----------------------------------------------------------------------------------------------------------------------------------------------------|------------|
|                                                          | cloned into pUC19 cut with EcoRI and HindIII                                                                                                        |            |
| pLR135; $\Delta omamCD$ recombineering plasmid           | Hygromycin resistance cassette from pMP1064 cloned into pLR134 cut with EcoRV                                                                       | This study |
| pLR138; $\Delta omamEF$ precursor recombineering plasmid | Upstream and Downstream fragments of <i>omamEF</i> (MSMEG_2864-2865) with an hpaI site at the junction cloned into pUC19 cut with EcoRI and HindIII | This study |
| pLR140; $\Delta omamEF$ recombineering plasmid           | Hygromycin resistance cassette from pMP1064 cloned into pLR138 digested with HpaI                                                                   | This study |

122

123

124

125

126

127

128

129

130

131

132

133

| Primer                 | plasmid the primer was used to make | Sequence (5'-3')                                                | Description                                                                                            |
|------------------------|-------------------------------------|-----------------------------------------------------------------|--------------------------------------------------------------------------------------------------------|
| Mce4A_UPflank_forward  | pLR62                               | ACTAGTATGATCG<br>GCGGCACTGTTCG                                  | Amplification of flank Upstream of <i>mce4A</i> (MSMEG_5900) for cloning into pMP62 (ApaI)             |
| Mce4A_UPflank_reverse  | pLR62                               | GCCCCGGGTTTGGC<br>GTTTCCGTTCGAC                                 |                                                                                                        |
| Mce4A_DWNflank_forward | pLR62                               | GATATCGCGTTTCG<br>CGGAAAGGGACG                                  | Amplification of flank Downstream of <i>mce4A</i> (MSMEG_5900) for cloning into pMP62 (ApaI)           |
| Mce4A_DWNflank_reverse | pLR62                               | ATAGGGCCCGAC<br>GCGAGCGGTTTCG<br>ATGG                           |                                                                                                        |
| Mce4E_UPflank_forward  | pLR112                              | CAGCTATGACCAT<br>GATTACGCCACTA<br>GTGTGGGCAAGC<br>TCGCCGACTTCAC | Amplification of flank Upstream of <i>mce4E</i> (MSMEG_5896) for cloning into pUC19 (EcoRI, HindIII)   |
| Mce4E_UPflank_reverse  | pLR112                              | CGGCGGCCTGAT<br>ATCCGCCGCTGCC<br>GATCGCCAGGGT<br>G              |                                                                                                        |
| Mce4E_DWNflank_forward | pLR112                              | AGCGGCGGATAT<br>CAGGCCCGCCGAC<br>CCGTTCAAGATC                   | Amplification of flank Downstream of <i>mce4E</i> (MSMEG_5896) for cloning into pUC19 (EcoRI, HindIII) |
| Mce4E_DWNflank_reverse | pLR112                              | GTAACACGACGG<br>CCAGTGTCTAGA<br>GGGACTTGCTGTA<br>GATGAC         |                                                                                                        |
| Mce4E_pmv261_forward   | pLR142                              | CGGAATTCTGACC<br>TAAGGAGGTGAA<br>CGGGTGCGCACC<br>CTGGC          | Amplification of <i>mce4E</i> (MSMEG_5896) for cloning into PCR2.1 TOPO                                |
| Mce4E_pmv261_reverse   | pLR142                              | CGAAGCTTCTACG<br>GCCCTCGTGCTG                                   |                                                                                                        |
| Mce4E_pJSC77_forward   | pLR93                               | CGGAGGAATCAC<br>TTCGCAATGGCCA<br>CCGTGCGCACCT<br>GGCGATC        | Amplification of <i>mce4E</i> (MSMEG_5896) for cloning into pJSC77 (MscI-HindIII)                      |
| Mce4E_pJSC77_reverse   | pLR93                               | CGTAGTCCGGCA<br>CGTCGTACGGGT<br>AAGCTTGCGGCC                    |                                                                                                        |

|                                    |        |                                                                     |                                                                                                                    |
|------------------------------------|--------|---------------------------------------------------------------------|--------------------------------------------------------------------------------------------------------------------|
|                                    |        | CCTCGTGCTGCGT<br>CG                                                 |                                                                                                                    |
| Mce4E <sup>C16A</sup> _SDM_forward | pLR114 | GACCACCGAACT<br>GAGCGCCCGCAA<br>GCAGCA                              | Site Directed<br>Mutagenesis of<br><i>mce4E</i> <sup>C16A</sup>                                                    |
| Mce4E <sup>C16A</sup> _SDM_reverse | pLR114 | TGCTGCTTGCGGG<br>CGCTCAGTTCGGT<br>GGTC                              |                                                                                                                    |
| Mce4EF_UPflank_forward             | pMB250 | CAGCTATGACCAT<br>GATTACGCCACTA<br>GTGTGGGCAAGC<br>TCGCCGACTTCAC     | Amplification of flank<br>Upstream of <i>mce4E</i><br>(MSMEG_5896) for<br>cloning into pUC19<br>(EcoRI, HindIII)   |
| Mce4EF_UPflank_reverse             | pMB250 | GATCATCTACGG<br>GATATCCATGTTG<br>AGCGAGTTGAGA<br>C                  |                                                                                                                    |
| Mce4EF_DWNflank_forward            | pMB250 | CAACATGGATAT<br>CCCGTAGATGATC<br>GACCGGCTGAC                        | Amplification of flank<br>Downstream of <i>mce4E</i><br>(MSMEG_5896) for<br>cloning into pUC19<br>(EcoRI, HindIII) |
| Mce4EF_DWNflank_reverse            | pMB250 | GTAACGACGG<br>CCAGTGTCTAGA<br>GGGACTTGCTGTA<br>GATGAC               |                                                                                                                    |
| Mce4EF_pmv261_forward              | pLR110 | CGGAGGAATCAC<br>TTCGCAATGGCCA<br>CCGTGCGCACCT<br>GGCGATC            | Amplification of<br><i>mce4EF</i><br>(MSMEG_5896 and<br>MSMEG_5895) for<br>cloning into pmv261<br>(MscI-HindIII)   |
| Mce4EF_pmv261_reverse              | pLR110 | ACTACGTCGACAT<br>CGATATCAAGCCT<br>GCCTTGATCCA                       |                                                                                                                    |
| Mam4AB_UPflank_forward             | pLR96  | GTTGTAACGGA<br>CGGCCAGTGACT<br>AGTTGCCGCCCA<br>ACAAGTTCCCGAT<br>G   | Amplification of flank<br>Upstream of <i>mam4A</i><br>(MSMEG_5894) for<br>cloning into pUC19<br>(EcoRI, HindIII)   |
| Mam4AB_UPflank_reverse             | pLR96  | TCAGTTGATATCG<br>ATGGTGTCCAGC<br>GGCTCACTGCT                        |                                                                                                                    |
| Mam4AB_DWNflank_forward            | pLR96  | ACCATCGATATCA<br>ACTGATGCGCTCC<br>AAGCTCGTC                         | Amplification of flank<br>Downstream of <i>mam4A</i><br>(MSMEG_5894) for<br>cloning into pUC19<br>(EcoRI, HindIII) |
| Mam4AB_DWNflank_reverse            | pLR96  | GCTATGACCATG<br>ATTACGCCATCTA<br>GAGCACGATCCG<br>CGCCCGCTCAAC<br>AC |                                                                                                                    |

|                        |        |                                                               |                                                                                                                   |
|------------------------|--------|---------------------------------------------------------------|-------------------------------------------------------------------------------------------------------------------|
| Mam4A_pmv261_forward   | pLR143 | CGGAATTCTGACC<br>TAAGGAGGTGAA<br>TAGTGAGCAGTG<br>AGCCGCTGG    | Amplification of<br><i>mam4A</i><br>(MSMEG_5894) for<br>cloning into PCR2.1<br>TOPO                               |
| Mam4A_pmv261_reverse   | pLR143 | CGAAGCTTAGCTT<br>GGAGCGCATCAG<br>TTACC                        |                                                                                                                   |
| Mam4B_pmv261_forward   | pLR126 | CGGAGGAATCAC<br>TTCGCAATGGCCA<br>CCATGCGCTCCAA<br>GCTCGTC     | Amplification of<br><i>mam4B</i><br>(MSMEG_5893) for<br>cloning into pmv261<br>(MscI-HindIII)                     |
| Mam4B_pmv261_reverse   | pLR126 | ACTACGTCGACAT<br>CGATACTAGATC<br>GGCTTGATGGCGT<br>CGATCAG     |                                                                                                                   |
| Mam4AB_pmv261_forward  | pLR124 | CGGAATTCTGACC<br>TAAGGAGGTGAA<br>TAGTGAGCAGTG<br>AGCCGCTGG    | Amplification of<br><i>mam4AB</i><br>(MSMEG_5894 and<br>MSMEG_5893) for<br>cloning into pmv261<br>(MscI-HindIII)  |
| Mam4AB_pmv261_reverse  | pLR124 | ACTACGTCGACAT<br>CGATACTAGATC<br>GGCTTGATGGCGT<br>CGATCAG     |                                                                                                                   |
| OmamB_UPflank_forward  | pLR128 | AAACGACGGCCA<br>GTGTCTAGACCCG<br>ACATTCTTCCAGA<br>C           | Amplification of flank<br>Upstream of <i>omamB</i><br>(MSMEG_0236) for<br>cloning into pUC19<br>(EcoRI-HindIII)   |
| OmamB_UPflank_reverse  | pLR128 | CCGGGCGTACGT<br>CGTCGGATATCA<br>AGGCCAGCACGC<br>GCAACCGG      |                                                                                                                   |
| OmamB_DWNflank_forward | pLR128 | GCGTGCTGGCCTT<br>GATATCCGACGA<br>CGTACGCCCGGC<br>CCACTC       | Amplification of flank<br>Downstream of <i>omamB</i><br>(MSMEG_0236) for<br>cloning into pUC19<br>(EcoRI-HindIII) |
| OmamB_DWNflank_reverse | pLR128 | GACCATGATTAC<br>GCCAACTAGTGG<br>TCGCTGGCGGTGT<br>TGGAG        |                                                                                                                   |
| OmamB_pmv261_forward   | pLR141 | CGGAGGAATCAC<br>TTCGCAATGGCCA<br>CCTGGAGCCCATC<br>CGATGAGGAAC | Amplification of<br><i>omamB</i><br>(MSMEG_0236) for<br>cloning into pmv261<br>(MscI-HindIII)                     |
| OmamB_pmv261_reverse   | pLR141 | ACTACGTCGACAT<br>CGATAGCTCAGC                                 |                                                                                                                   |



|                         |        |                                                          |                                                                                                                      |
|-------------------------|--------|----------------------------------------------------------|----------------------------------------------------------------------------------------------------------------------|
|                         |        | GGGAGTGGGCCG<br>GGCGTAC                                  |                                                                                                                      |
| OmamCD_UPflank_forward  | pLR134 | AAACGACGGCCA<br>GTGTCTAGAACT<br>CATCCGGCGCATC<br>CAC     | Amplification of flank<br>Upstream of <i>omamC</i><br>(MSMEG_4771) for<br>cloning into pUC19<br>(EcoRI-HindIII)      |
| OmamCD_UPflank_reverse  | pLR134 | CGTCGATCTTGGG<br>ATATCCGTTGATC<br>ACGGGCAACGTA<br>GG     |                                                                                                                      |
| OmamCD_DWNflank_forward | pLR134 | CCGTGATCAACG<br>GATATCCCAAGA<br>TCGACGGCAACT<br>G        | Amplification of flank<br>Downstream of<br><i>omamD</i><br>(MSMEG_4770) for<br>cloning into pUC19<br>(EcoRI-HindIII) |
| OmamCD_DWNflank_reverse | pLR134 | GACCATGATTAC<br>GCCAACTAGTGG<br>GTGAGTTCGTCGT<br>TTAC    |                                                                                                                      |
| OmamEF_UPflank_forward  | pLR138 | AAACGACGGCCA<br>GTGTCTAGAGAC<br>GAGCTGTGCGGG<br>CTAC     | Amplification of flank<br>Upstream of <i>omamE</i><br>(MSMEG_2864) for<br>cloning into pUC19<br>(EcoRI-HindIII)      |
| OmamEF_UPflank_reverse  | pLR138 | AGTTCATCGGT<br>TAACTCGGTACCC<br>ACTCGTTCAGTCG<br>TGCTCAG |                                                                                                                      |
| OmamEF_DWNflank_forward | pLR138 | GTGGGTACCGAG<br>TTAACCGATGGG<br>AACTGGCTGATCT<br>C       | Amplification of flank<br>Downstream of <i>omamF</i><br>(MSMEG_2865) for<br>cloning into pUC19<br>(EcoRI-HindIII)    |
| OmamEF_DWNflank_reverse | pLR138 | GACCATGATTAC<br>GCCAACTAGTAG<br>GCATACGACCGG<br>GTGTTC   |                                                                                                                      |

135

136

137

138

139

140

141

142 **References:**

- 143 1. El-Gebali S, Mistry J, Bateman A, Eddy SR, Luciani A, Potter SC, Qureshi M, Richardson  
144 LJ, Salazar GA, Smart A, Sonnhammer ELL, Hirsh L, Paladin L, Piovesan D, Tosatto SCE,  
145 Finn RD. 2019. The Pfam protein families database in 2019. *Nucleic Acids Res* 47:D427–  
146 D432.
- 147 2. Hayden JD, Brown LR, Gunawardena HP, Perkowski EF, Chen X, Braunstein M. 2013.  
148 Reversible acetylation regulates acetate and propionate metabolism in *Mycobacterium*  
149 *smegmatis*. *Microbiol Read Engl* 159:1986–1999.
- 150 3. Perkowski EF, Miller BK, McCann JR, Sullivan JT, Malik S, Allen IC, Godfrey V, Hayden  
151 JD, Braunstein M. 2016. An orphaned Mce-associated membrane protein of *Mycobacterium*  
152 *tuberculosis* is a virulence factor that stabilizes Mce transporters. *Mol Microbiol* 100:90–  
153 107.
- 154 4. Feltcher ME, Gibbons HS, Ligon LS, Braunstein M. 2013. Protein export by the  
155 mycobacterial SecA2 system Is determined by the preprotein mature domain. *J Bacteriol*  
156 195:672–681.
- 157 5. Klepp LI, Forrellad MA, Osella AV, Blanco FC, Stella EJ, Bianco MV, Santangelo M de la  
158 P, Sasseti C, Jackson M, Cataldi AA, Bigi F, Morbidoni HR. 2012. Impact of the deletion of  
159 the six mce operons in *Mycobacterium smegmatis*. *Microbes Infect* 14:590–599.

160

- 161 6. Guo XV, Monteleone M, Klotzsche M, Kamionka A, Hillen W, Braunstein M, Ehrt S,  
162 Schnappinger D. 2007. Silencing essential protein secretion in *Mycobacterium smegmatis* by  
163 using tetracycline repressors. *J Bacteriol* 189:4614–4623.
- 164 7. Ligon LS, Rigel NW, Romanchuk A, Jones CD, Braunstein M. 2013. Suppressor analysis  
165 reveals a role for SecY in the secA2-dependent protein export pathway of mycobacteria. *J*  
166 *Bacteriol* 195:4456–4465.
- 167 8. Rengarajan J, Murphy E, Park A, Krone CL, Hett EC, Bloom BR, Glimcher LH, Rubin EJ.  
168 2008. *Mycobacterium tuberculosis* Rv2224c modulates innate immune responses. *Proc Natl*  
169 *Acad Sci* 105:264–269.
- 170 9. Rasband, W.S., ImageJ, U. S. National Institutes of Health, Bethesda, Maryland, USA,  
171 <https://imagej.nih.gov/ij/>, 1997-2018.
- 172 10. Alstchul SF, Gish W, Miller Q, Myers EW, Lipman DJ. 1990. Basic local alignment search  
173 tool. *J Mol Bio.* 215:403-41.
- 174 11. Snapper SB, Melton RE, Mustafa S, Kieser T, Jacobs WR. 1990. Isolation and  
175 characterization of efficient plasmid transformation mutants of *Mycobacterium smegmatis*.  
176 *Mol Microbiol* 4:1911–1919.
- 177 12. Stover CK, de la Cruz VF, Fuerst TR, Burlein JE, Benson LA, Bennett LT, Bansal GP,  
178 Young JF, Lee MH, Hatfull GF. 1991. New use of *BCG* for recombinant vaccines. *Nature*  
179 351:456–460.

- 180 13. Glickman MS, Cox JS, Jacobs WR. 2000. A novel mycolic acid cyclopropane synthetase is  
181 required for cording, persistence, and virulence of *Mycobacterium tuberculosis*. *Mol Cell*  
182 5:717–727.
- 183 14. Pavelka MS, Jacobs WR. 1999. Comparison of the construction of unmarked deletion  
184 mutations in *Mycobacterium smegmatis*, *Mycobacterium bovis bacillus Calmette-Guérin*,  
185 and *Mycobacterium tuberculosis* H37Rv by allelic exchange. *J Bacteriol* 181:4780–4789.
- 186 15. Martinelli DJ, Pavelka MS. 2016. The RipA and RipB Peptidoglycan endopeptidases are  
187 individually nonessential to *Mycobacterium smegmatis*. *J Bacteriol* 198:1464–1475.
- 188 16. van Kessel JC, Hatfull GF. 2007. Recombineering in *Mycobacterium tuberculosis*. *Nat*  
189 *Methods* 4:147–152.
- 190 17. Sanders AN, Wright LF, Pavelka MS. 2014. Genetic characterization of mycobacterial L,D-  
191 transpeptidases. *Microbiol Read Engl* 160:1795–1806.
- 192 18. Miller BK, Hughes R, Ligon LS, Rigel NW, Malik S, Anjuwon-Foster BR, Sacchettini JC,  
193 Braunstein M. 2019. *Mycobacterium tuberculosis* SatS is a chaperone for the SecA2 protein  
194 export pathway. *eLife* 8:e40063.
- 195
